# Supplementary material
Source: PubMed Central journal article supplement (PMC4862866)
Supplement: NIHMS753099-supplement-f.pdf [file NIHMS753099-supplement-f.pdf]

**Supplementary Table 1**

| <b>F Primer</b>         | <b>R Primer</b>         | <b>Gene</b>   |
|-------------------------|-------------------------|---------------|
| AGATTTCGGGATATGCTGTTGGC | TCGGGTCCTAGACCAGTGTTTC  | 36B4          |
| TCTTTTCCTCGGAGCATGACA   | GACCTCTCTACTCACTTCTCCAG | ACADL         |
| TTGAGTTGACGGAACAGCAG    | CCCCAAAAGAATTTGCTTCAA   | ACADM         |
| TATCTCTGCCAGCGACTTT     | TGGGTATGGGAACACCTGAT    | ACADVL        |
| TCCAGGCTTCAAGGAATGGAC   | CAAGGCACGTTGCACGATG     | ALT1          |
| ATTACGACAGTTCGGGCATC    | CCGGAGAACATCAAACAGGT    | ASNS          |
| CCAGGTCTCTGCCTCAGAAG    | CATCTCCAGGGGTCTGTTGT    | ATF3          |
| CTCTTGACCACGTTGGATGAC   | CAACTTCACTGCCTAGCTCTAAA | ATF4          |
| CACAGCTCTCCTTCCTCTGG    | GTAGGAGGCTGAGGGAGGTC    | ATF5          |
| GCAGCAAGAGTTACCAGTGAG   | CCAATGATGAAAGGAAGGCTACG | BCDKD         |
| AGTTTGGGGTCGAGGCTTTC    | TGGTGGCCGCTATGAAGTTG    | BDH1          |
| GCAGCACAGTGGACATTCAT    | TTGCATTTCCACAGCAGAAG    | CD68          |
| AAACCCACCAGGCTACAGTG    | TCCTTGTAATGTGCGAGCTG    | CPT1A         |
| AGGCCCTATTTGGCTACGTT    | CTTCCTGGTGCTAGGAGTGG    | DGAT2         |
| GGTTACACTGTGCTAGGTGTTG  | TCCAGGCGCATGAGGCTCAGC   | FAS           |
| CTGGGGGTCTACCAAGCATA    | CACCCAGGATTTGAATGACC    | FGF21         |
| ACTACATCAAAATGGGCTCTCAG | AGCAGAAATGGAATGCGGACC   | HADH          |
| ATCAACTCCCTGTGCCTGAC    | GCAATGTCACCACAGACCAC    | HMGCS2        |
| TCGGTGACCTTCTGGGTT      | CAAAGCCCATCTTGTTGCA     | HPD           |
| CAGAGAGCGTCAAGGTCGC     | TTCGCACAAACTTTGAGGGCA   | KLF15         |
| CAAGAAGGAATGGGTCCAGA    | AGACCTTAGGGCAGATGCAG    | MCP1          |
| ACACTGGGACCTGTCACTCC    | CGATGCCATCAAAGACAATG    | MMP2          |
| CCCTGCCATTGTTAAGACC     | TGCTGCTGTTCTGTTTTTC     | PGC1 $\alpha$ |
| TGAAAGAAGCGGTGAACCACTG  | TGGCATCTCTGTGTCAACCATG  | PPAR $\gamma$ |
| GGGGCAAAGGATGTTGAGAG    | TTTGTGTGCGGATCAGAGG     | PRODH         |
| GCGTTCCAGAATGACGTGTAC   | CTTTCAGGTCAGACATGTCCAG  | SCD-1         |
| CGCCATGGACGAGCTGGCCTT   | GGGAAGTCACTGDCTTGGTTG   | SREPB1C       |
| GTGGATATGCCACAAGTCC     | AAGAAGCTGCAGGCACTGAT    | TIMP          |
| GCTACACCTCTGGCTGCTTC    | CTTGCTCTCGTTCCAAAAGG    | TRB3          |
| TGCTGAGCTGGTGACCTATG    | GAGCATGGTAAGGGCACAGT    | UCP2          |
