# Supplementary material
Source: PubMed Central journal article supplement (PMC4862866)

# Supplemental Figure 1

**A**

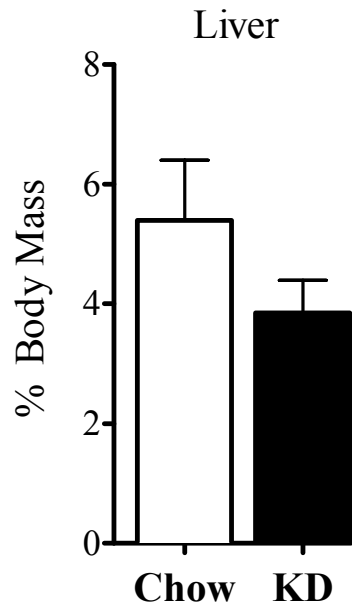

**B**

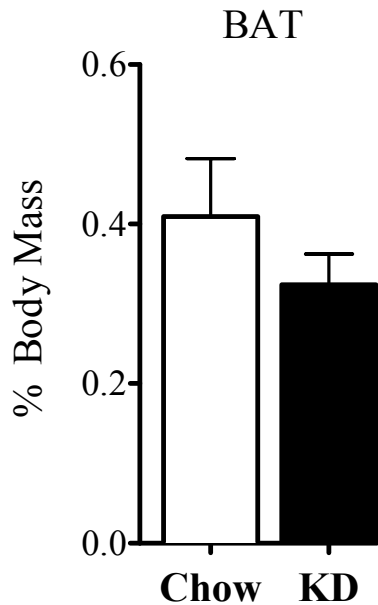

**C**

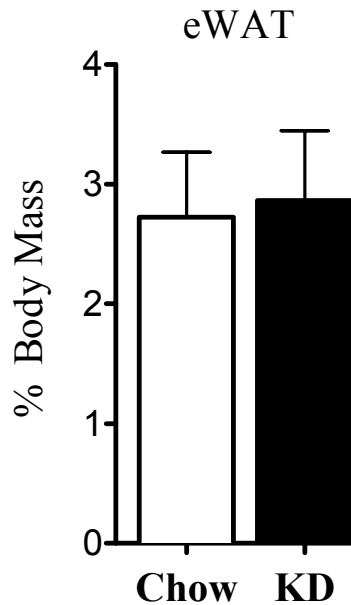

Supplement: NIHMS753099-supplement-a.pdf [file NIHMS753099-supplement-a.pdf]

A

## Short Term

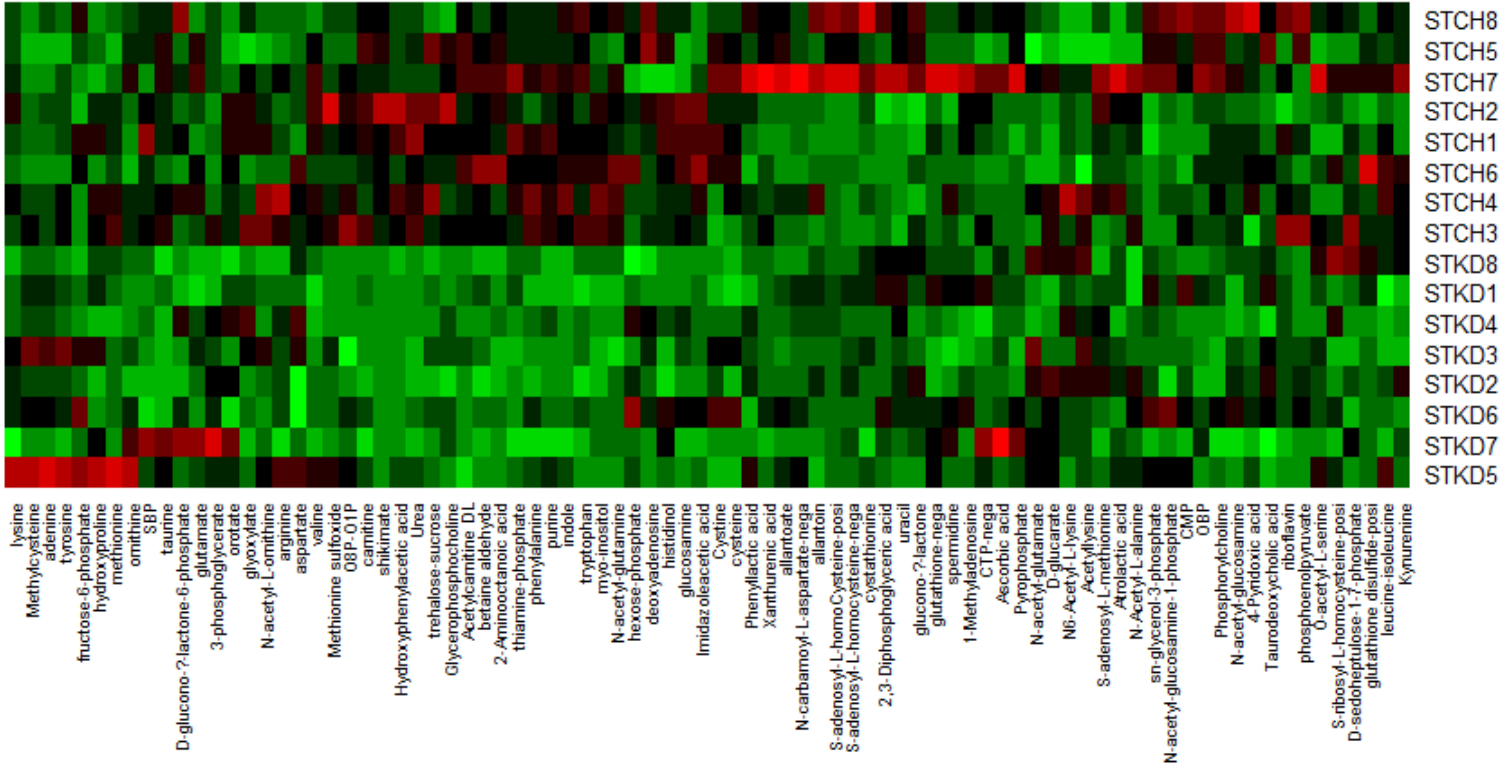

B

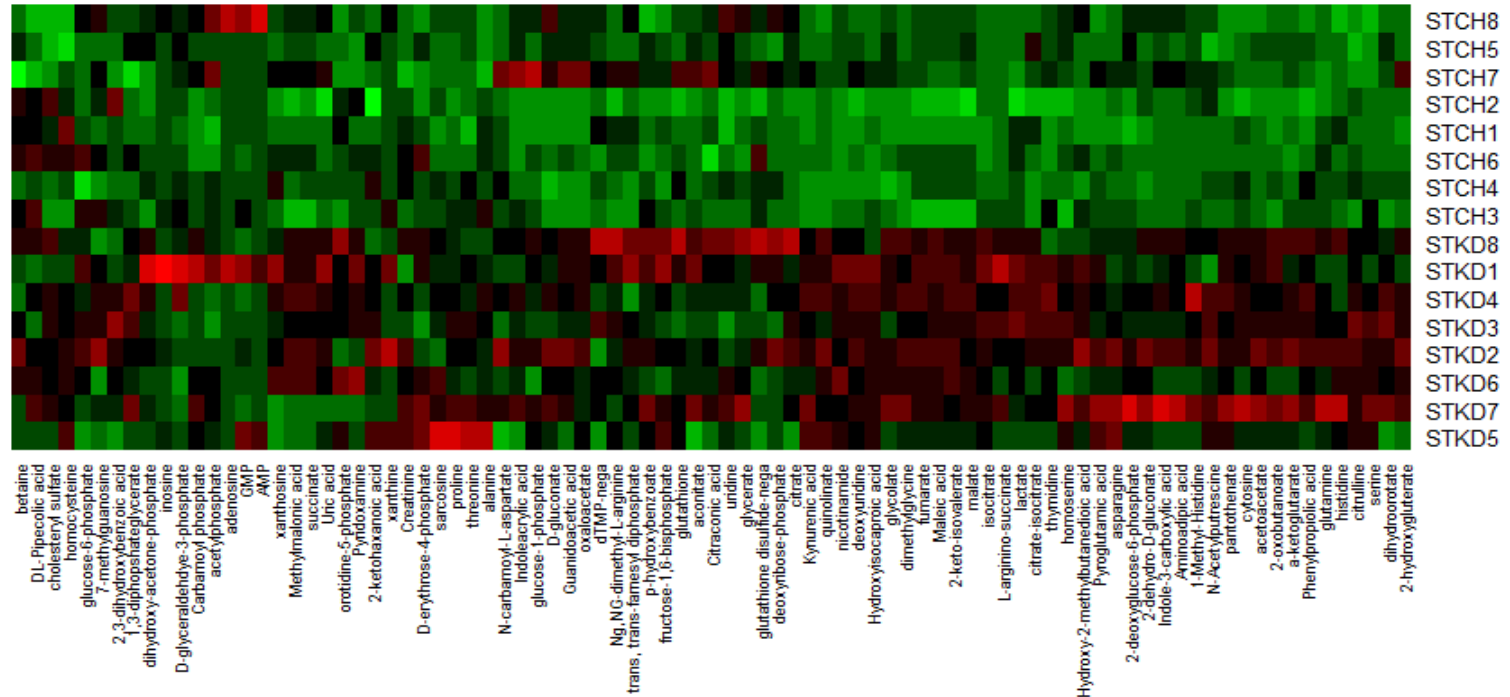

Supplement: NIHMS753099-supplement-b.pdf [file NIHMS753099-supplement-b.pdf]

## A Long Term

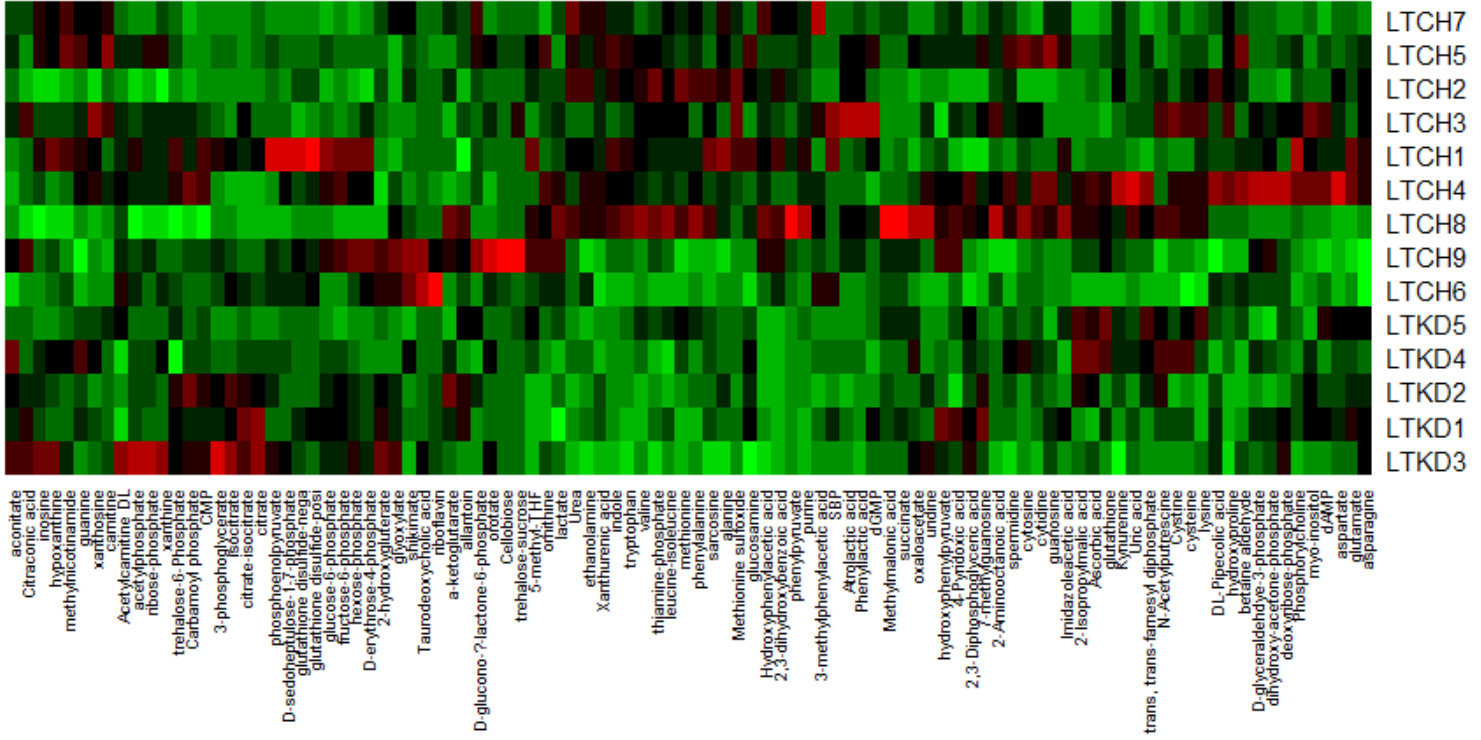

## B

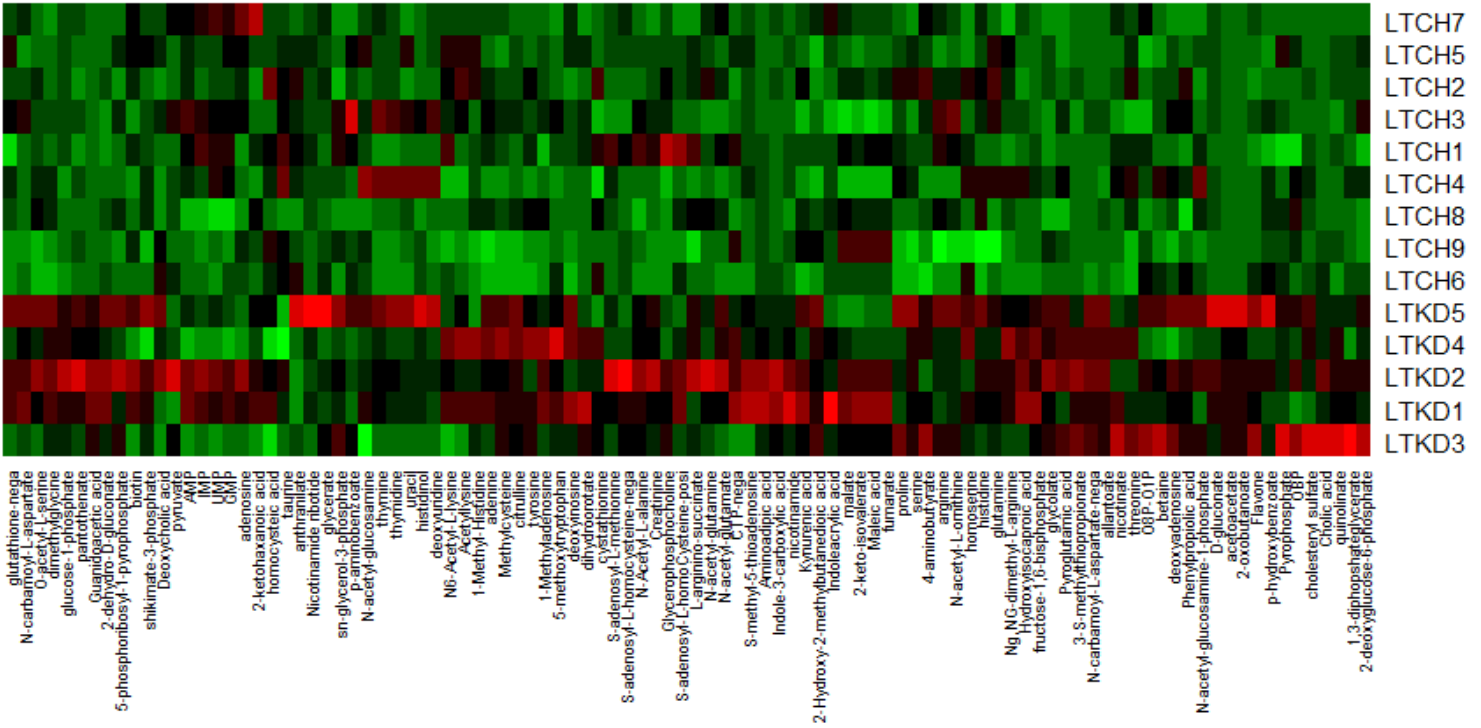

Supplement: NIHMS753099-supplement-c.pdf [file NIHMS753099-supplement-c.pdf]

# Supplemental Figure 4

## A Short Term

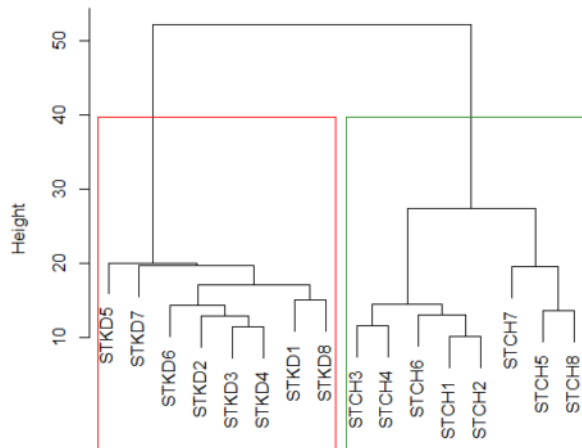

## B Long Term

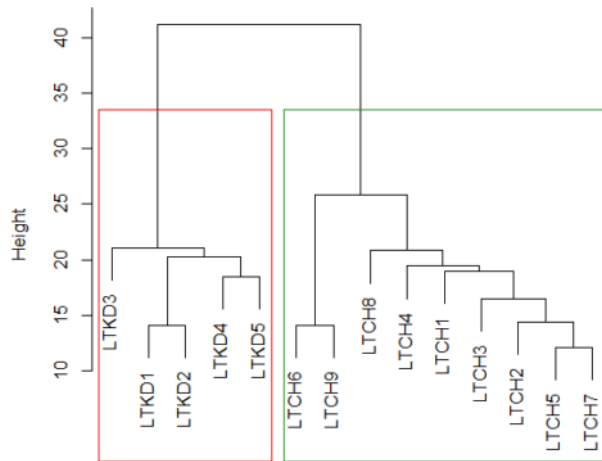

Supplement: NIHMS753099-supplement-d.pdf [file NIHMS753099-supplement-d.pdf]

# Supplemental Figure 5

**A**

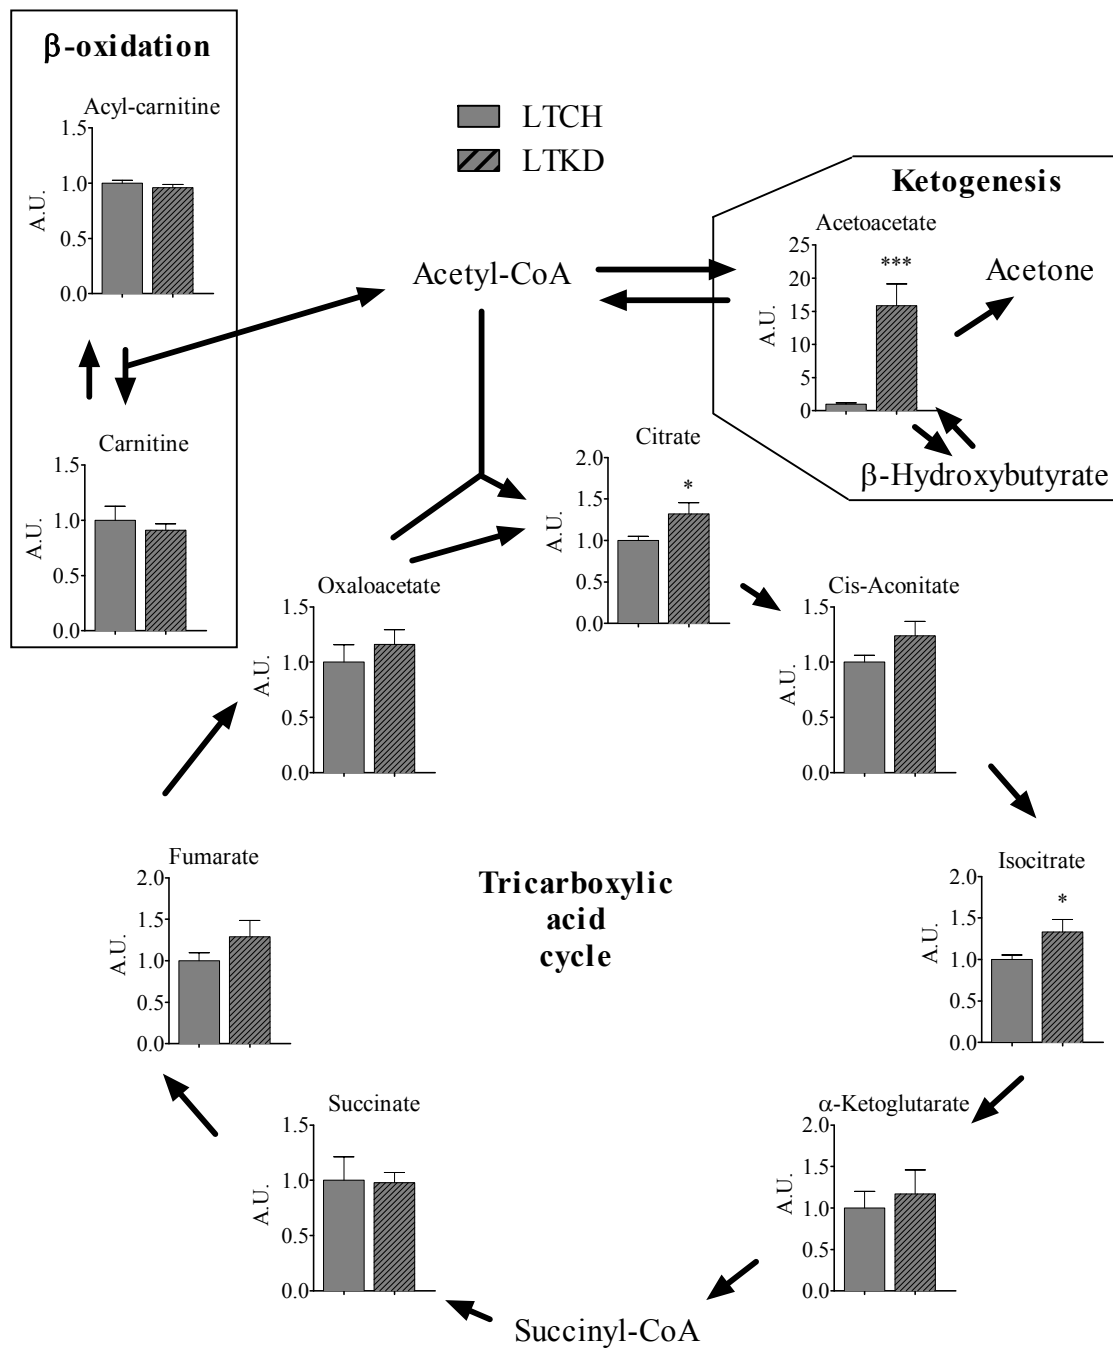

**B**

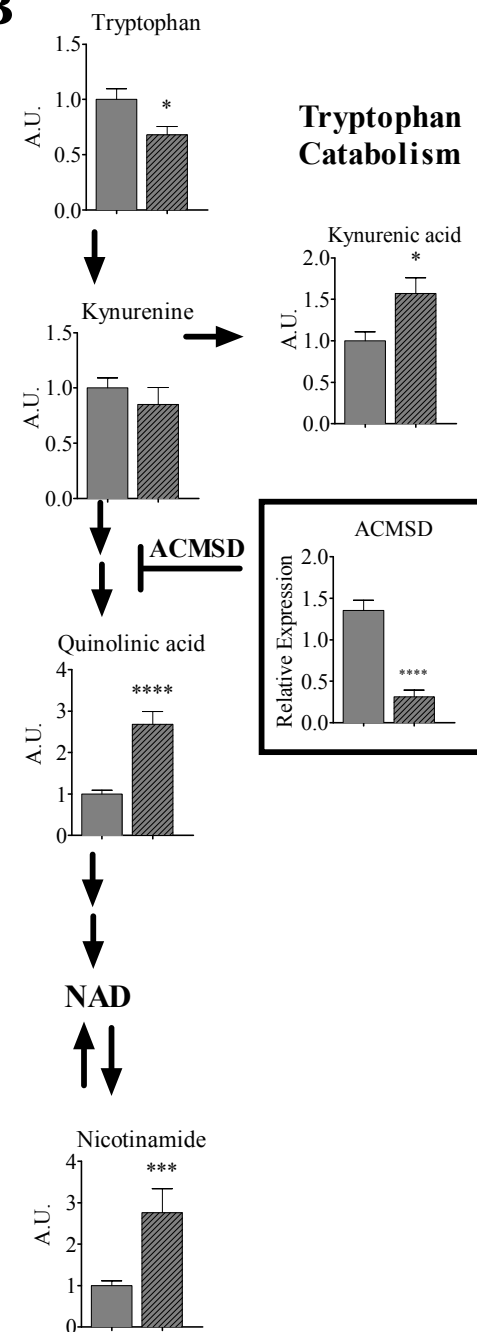

Supplement: NIHMS753099-supplement-e.pdf [file NIHMS753099-supplement-e.pdf]
